# Supplementary material for: Prospects of estrogen receptor β activation in the treatment of castration-resistant prostate cancer
Source: PubMed Central journal article supplement (PMC5471027; doi:10.18632/oncotarget.16496), 2017-03-23
Supplement: oncotarget-08-34971-s001.pdf [file oncotarget-08-34971-s001.pdf]

## Prospects of estrogen receptor $\beta$ activation in the treatment of castration-resistant prostate cancer

### SUPPLEMENTARY MATERIALS AND METHODS

In order to measure the activity of transcription factors, the reporter system Dual-Luciferase Reporter Assay (Promega, Fitchburg, WI, USA) was used. Here,  $6 \times 10^4$  VCaP cells each were transfected with reporter vectors for either steroid receptor (MMTV-Luc, kindly provided by Megan Cully, Cancer Research, UK, [33]), or AR (rPb-Luc, pGL3-basic carrying the minimal rat probasin promoter, [34]) induced transcription and a PRL-Luc

vector (Promega, Fitchburg, WI, USA) as reference for transfection efficiency. 24h after transfection, cells were stimulated with 10nM DHT, 25 $\mu$ M 8 $\beta$ -VE2, or DMSO as control and incubated for another 24h. VCaP cells were lysated according to the manufacturer's instructions and luciferase activity was measured using the Synergy Mx plate reader.

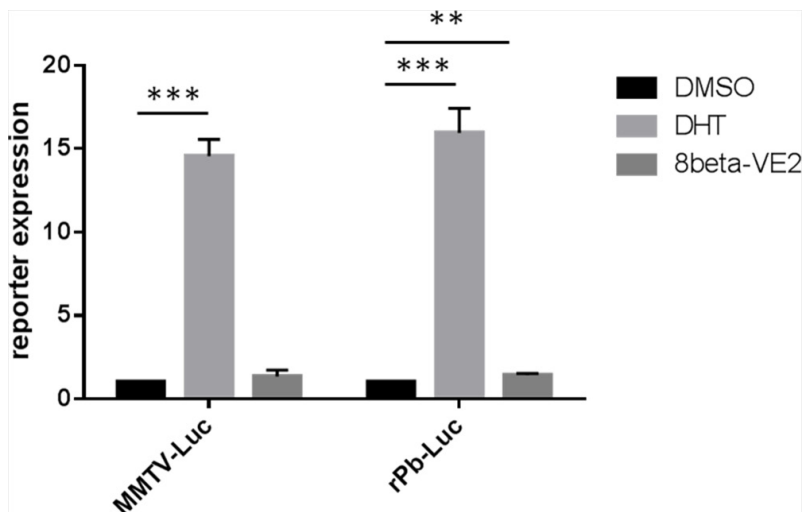

**Supplementary Figure 1: In order to prove that 8 $\beta$ -VE2 treatment did not induce unspecific AR activation a reporter assay was performed.** Transcriptional AR activity in DHT and 8 $\beta$ -VE2 treated VCaP cells was quantified. VCaP cells were treated with DMSO, 10nM DHT, or 25 $\mu$ M 8 $\beta$ -VE2 and MMTV and rPb promoter activation was measured 24h after treatment start. DHT treatment strongly induced both MMTV and rPb regulated luciferase (Luc) reporter gene expression. Treatment with 8 $\beta$ -VE2 did not activate the MMTV promoter at all and only minor rPb regulated reporter gene expression was induced by 8 $\beta$ -VE2. Data represent the mean +/- s.d. of three independent experiments, which were performed in duplicates. \* P<0.05, \*\* P< 0.01, \*\*\* P<0.0001 compared to DMSO control.

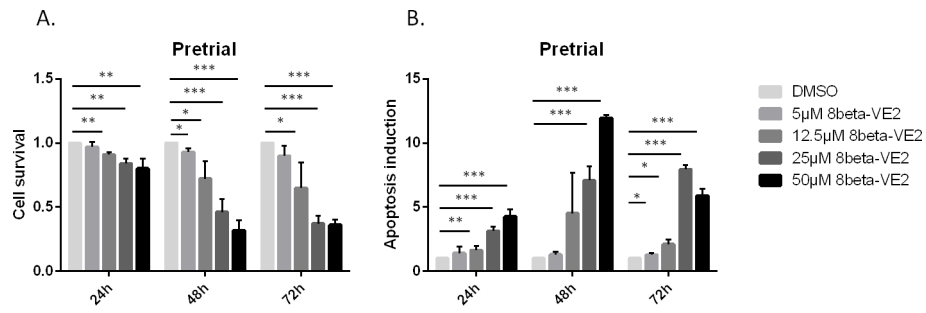

**Supplementary Figure 2: Efficacy evaluation of ER $\beta$ -specific agonist 8 $\beta$ -VE2.** VCaP cells were treated with DMSO, 5  $\mu$ M 8 $\beta$ -VE2, or 25  $\mu$ M  $\beta$ -VE2 and (A) cell survival and (B) apoptosis were measured 24, 48, and 72 h after the start of treatment. The data represent the mean $\pm$ s.d. of three independent experiments, which were performed in duplicate. \* P<0.05, \*\* P<0.01, \*\*\* P<0.0001 compared with DMSO control.
